# Supplementary material for: Enhanced stability of hippocampal place representation caused by reduced magnesium block of NMDA receptors in the dentate gyrus
Source: PubMed Central journal article supplement (PMC4073519; doi:10.1186/1756-6606-7-44), 2014-06-04
Supplement: 1756-6606-7-44-S2.pdf [file 1756-6606-7-44-S2.pdf]

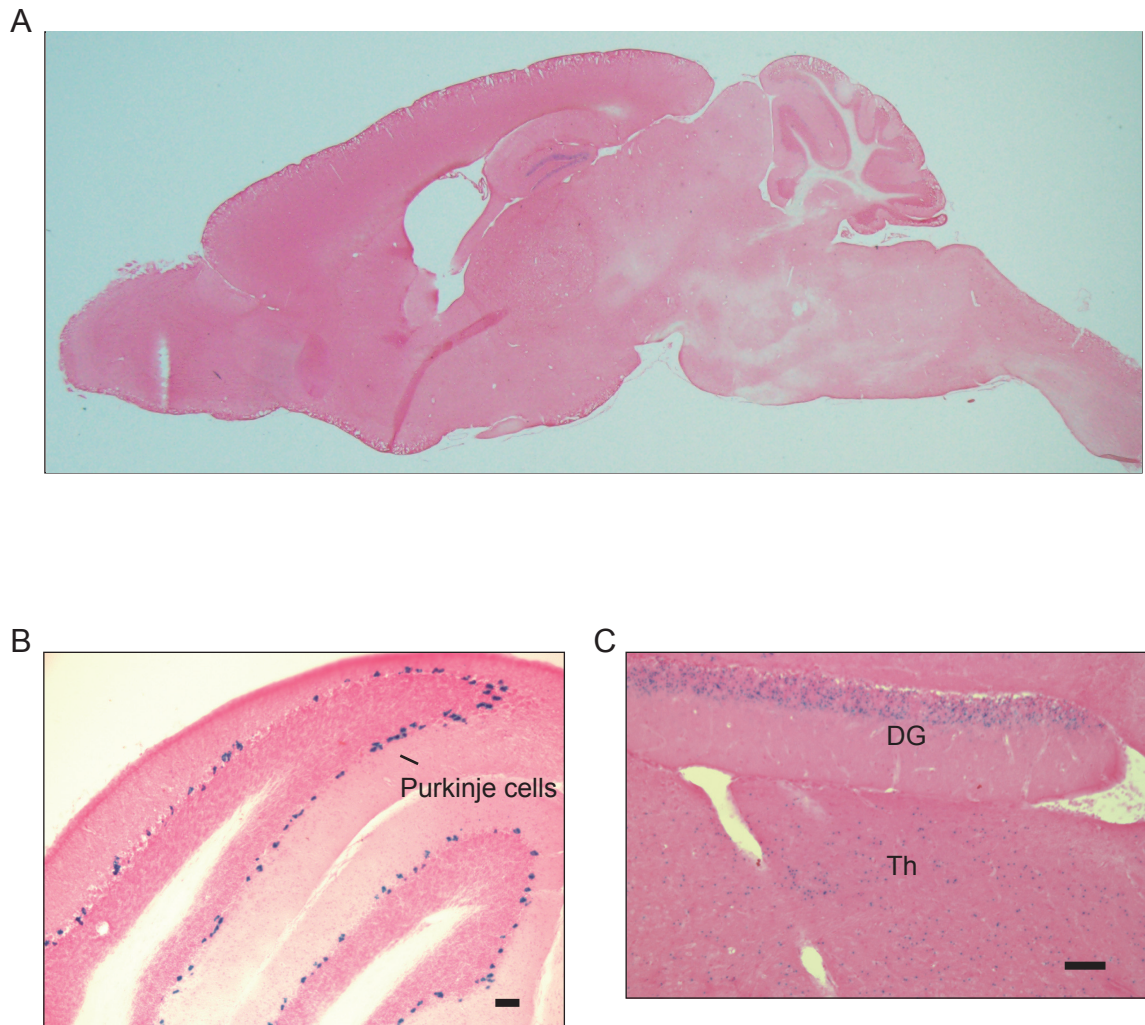

**Figure S2, Expression of Cre recombinase in the TDG-Cre mouse.**

The lacZ expression was visualized using X-gal staining. (A) Whole-brain, (B) cerebellum, (C) thalamus. DG: dentate gyrus, Th: thalamus. Scale bars: 100  $\mu$ m.
