# Supplementary material for: Enhanced stability of hippocampal place representation caused by reduced magnesium block of NMDA receptors in the dentate gyrus
Source: PubMed Central journal article supplement (PMC4073519; doi:10.1186/1756-6606-7-44), 2014-06-04
Supplement: 1756-6606-7-44-S6.pdf [file 1756-6606-7-44-S6.pdf]

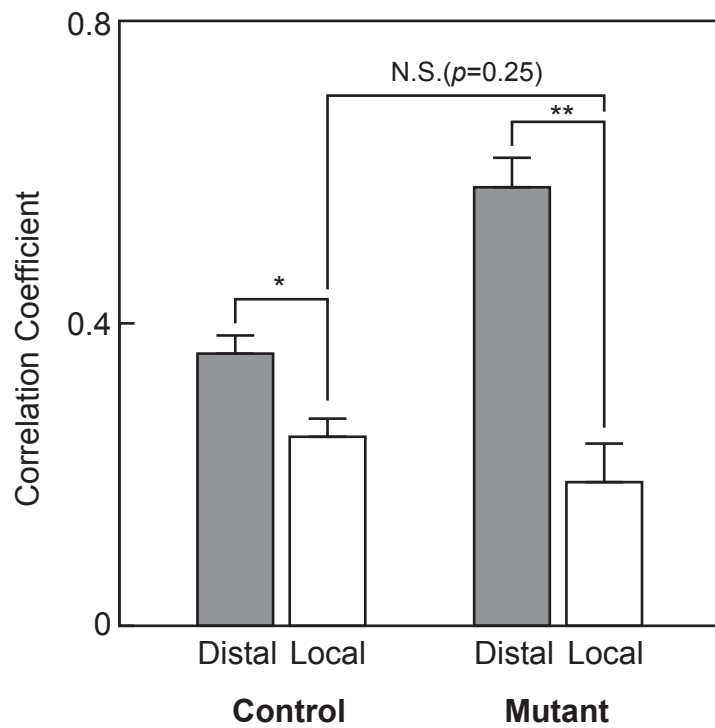

**Figure S6, Place field similarity measurements in distal cue- and local cue-centric coordinate frames.**

Correlation coefficients between the two place fields (“original cue” vs “rotated cue”) in control and mutant mice were calculated using distal cue (recording room, door, etc)- and local cue (paper towel)-centric coordinate frames. Data are shown in mean  $\pm$  SE. Significance was evaluated using the Wilcoxon rank sum test. \* $p = 0.0016$ ; \*\*  $p = 9.0 \times 10^{-7}$ .
