# Supplementary material for: Enhanced stability of hippocampal place representation caused by reduced magnesium block of NMDA receptors in the dentate gyrus
Source: PubMed Central journal article supplement (PMC4073519; doi:10.1186/1756-6606-7-44), 2014-06-04
Supplement: 1756-6606-7-44-S7.pdf [file 1756-6606-7-44-S7.pdf]

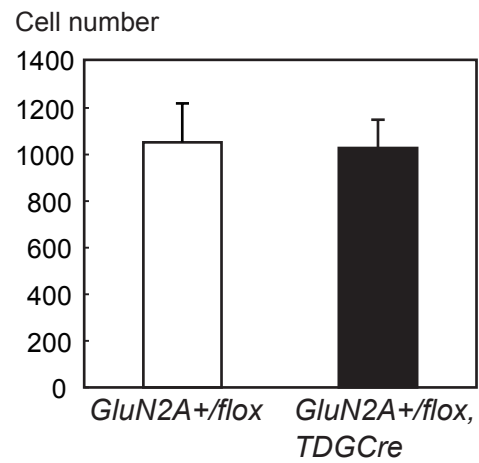

**Figure S7, The number of BrdU-positive cells in the DG.**

BrdU-positive cells in the subgranular zone of the DG and hilus are not detectably different in the mutant mice and control mice 24 h after BrdU administration.
